# Supplementary material for: Activity assays of NnlA homologs suggest the natural product N -nitroglycine is degraded by diverse bacteria
Source: publisher site journal article supplement (doi:10.3762/bjoc.20.75), 2024-04-17
Supplement: Additional file 1 [file 1860-5397-20-75-S1.pdf]

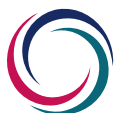

## Supporting Information

for

### **Activity assays of NnIA homologs suggest the natural product *N*-nitroglycine is degraded by diverse bacteria**

Kara A. Strickland, Brenda Martinez Rodriguez, Ashley A. Holland, Shelby Wagner, Michelle Luna-Alva, David E. Graham and Jonathan D. Caranto

*Beilstein J. Org. Chem.* **2024**, *20*, 830–840. [doi:10.3762/bjoc.20.75](https://doi.org/10.3762/bjoc.20.75)

## Additional Figures and Tables

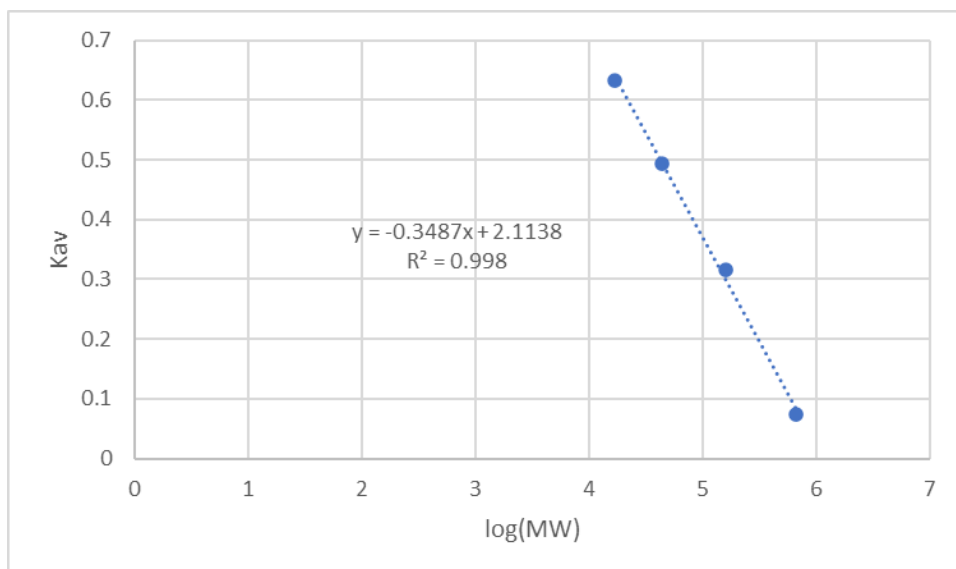

**Figure S1:** Analytical size exclusion chromatography calibration curve of standards. Flow rate 0.75 mL/min, 100 mM tricine and 100 mM NaCl buffer pH 7.5.

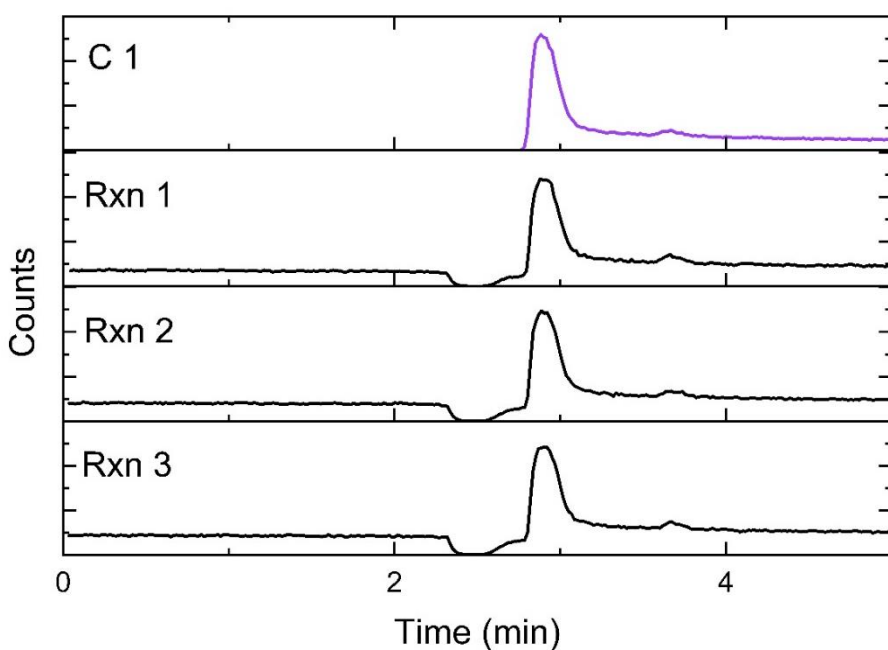

**Figure S2:** Representative LC-MS EICs monitoring molecular anion of 2-NAE ( $m/z$  105.03) in samples containing 2 mM 2-NAE, excess titanium citrate, and either no Vs NnIA for the control sample or 20  $\mu$ M reduced Vs NnIA ( $\text{Fe}^{\text{II}}$ -NnIA) for the reaction samples. Samples were incubated overnight at room temperature in deoxygenated 23.3 mM tricine buffer, pH 7.5.

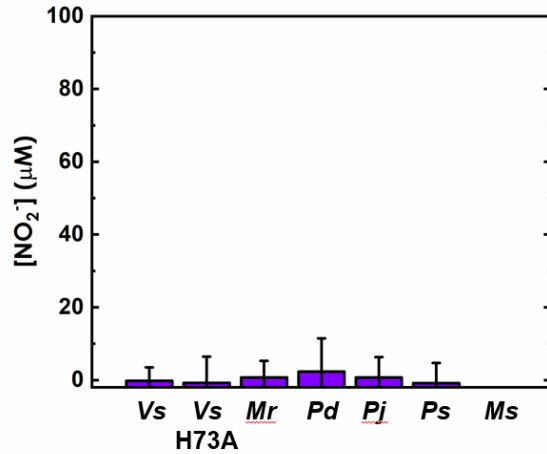

**Figure S3:** Nitrite concentrations observed in overnight cultures of *E. coli* transformed with NnIA homologs or variants grown in the presence of 2-NAE. Cells were incubated overnight in diluted LB containing IPTG and 3 mM NNG and incubated overnight at 37 °C.

```

MBW2064617      -----MAGNGDKRLTELIRLAMECMGVAVTIIDPQGTLLYYNKQAEKILDR  46
MCK4988321      -----MNENERKTKLGELVNLAMDCLGVAVTIIDTKGTLLYYNQHSAKILDR  47
WP_189438608    MSQNHSAFRKQVADRTL DGWELEGCAEWLIDQQGVGVSII DTQGRLLFYNQWADNKMPR  60
WP_054784913    -MTDNNNELPEVTDQRILEAWKLSGWADRLLEEAGIGVTIIDKDGKLLYYNKWASENLDR  59
WP_282531508    ----MDEKLPEVTQQRVLPGWTVSQWAGGLIEHAGVGVTILDREGRVMFYNQWAANRLDR  56
NnIA_(OUM02170) MNQVNTTEELPEVVDQRILAGWRLSEWADRILEYAGVGVTLDVRLGRCVYYNQWAKDHLDLDR  60
WP_066989343    --MTTHADLTEVFEHRIVADWALGEWADRLLEQAGLGVTIVDRHGVMYYNKWAAEHLDR  58
WP_051342206    ---MTQAILPEVTDARILDGWQLSGWADRLLEQAGVGVTIVDRTGRVLYYNKWADEHLDR  57
WP_030511367    --MTSQAEPAAEAESRIATDWGLDEWADRLIDQAGVGVTILNRHGTVMYYNKWASEHLDR  58
WP_191054027    --MSSQVELAEVAESRIATDWGLDQWADRILEQAGFGVTILDRHGTVMYYNKWASEHLDR  58
WP_195903080    --MSSQVELAEVAESRIATDWGLDQWADRILEQAGVGVTILDRHGTVMYYNKWASEHLDR  58

```

:            ::   \*..\*:::   \*   ::\*:   . . . \*

|                 |                                                               |     |
|-----------------|---------------------------------------------------------------|-----|
| MBW2064617      | KPEYIGKDVHSHHKRAASNKLDMMLEDFQ-KGRTEPFHYQARPYGE-TILVILSPIFED   | 104 |
| MCK4988321      | KPEYIGTDIHSHHKEAAINKVVDLMLKEFE-GGRKDFHFEAKPYGK-IIFVTLAPIIKN   | 105 |
| WP_189438608    | EPEYLGQKVQEHHRKQITNVRFEAMLDLFRKEGRTEAVKYVAKPYEGLTIIVIVTPIIVE  | 120 |
| WP_054784913    | QPRHIGHNVKENHRRRSITNPRFDAMLQLFR-DGRKDPVRYVANPYGTTTILVTVSPIHID | 118 |
| WP_282531508    | KPEYIGKDVNRHHRKKITNPRFDAMLKLFEGRTDPVHYVARPYGKITILVTVSPIKVD    | 115 |
| Nn1A_(OUM02170) | KPGYIGDEIHNHRRRAITNPRFDAMLKLFEGRMEPVRVYVARPYGKTTILVTVSPIYVE   | 119 |
| WP_066989343    | QPGYLGHSHVHEHHHRKITNPRFDAMLKLFV-DGRIEPVQYVARPYGKTTILVTVSPIRIG | 117 |
| WP_051342206    | KPEYIGNDVRDRHRQPITNPRFDAMIALFE-EGRVEPVRVYVARPYGKTIILVTVSPIWVD | 116 |
| WP_030511367    | RPEYIGNDVRKRHRRAVTNPRFDAMLKLFEGRVEPVRVYVARPYGKTTILVTVSPIRVD   | 117 |
| WP_191054027    | KPEYIGNDVRKRHRRAVTNPRFDAMRLFE-EGRVEPVRVYVARPYGRTTILVTVSPIRVD  | 117 |
| WP_195903080    | MPEYIGNDVRKHHRRAVTNPRFDAMRLFE-EGRVEPVSYVARPYGKITILVTVSPIRVN   | 117 |
|                 | * ::* .....*:. * ::: *: * ** : . * *.** *: * ::**             |     |
|                 |                                                               |     |
| MBW2064617      | AKFVGCVCVRLKDDTESR-----                                       | 123 |
| MCK4988321      | GEFLGCVQTVRLKNTVSAHQ-----                                     | 125 |
| WP_189438608    | GELVAFQCQTVLDKDEIQGMCETFDESIGNITFQRDILPGSEPG-----             | 162 |
| WP_054784913    | EELVGFSQFVLLKEEVQELCCLFDQHGRDPFEKDMLPNGPPT-----               | 160 |
| WP_282531508    | GELVGYSQIVLMKDEIQELFRRFDESGRESFEKDMLPAWPFSGND-----            | 160 |
| Nn1A_(OUM02170) | GELVGYSQIVLLKDEVEALCQRFNASGRESFEREMLPDSTPSNDD-----            | 164 |
| WP_066989343    | GELVGLAQLVLLKDEVQELFSRFDDSGRESFERDMLPDGYPGA-----              | 160 |
| WP_051342206    | GELVGFSQIVLLKNEVQELCERFDASGRESFEREMLPNGATGY-----LTYKNT        | 166 |
| WP_030511367    | GELVGFSQIVLLKDEVQELCARFDESGRESFEREMLPNGPPAT-----              | 160 |
| WP_191054027    | GELVGFSQVVLLKDEIQELCARFDESGRESFEREMLPDTPAVARDPAAGQCSSRRS-     | 173 |
| WP_195903080    | GELVGFSQIVLLKDEVQELFALFDESGRESFEREMLPNGLPTA-----              | 160 |
|                 | :::. * * *: .                                                 |     |

**Figure S4:** Amino sequence alignment of Nn1A homologs shown in Figure 6 of main text. Conserved basic residues are colored red.

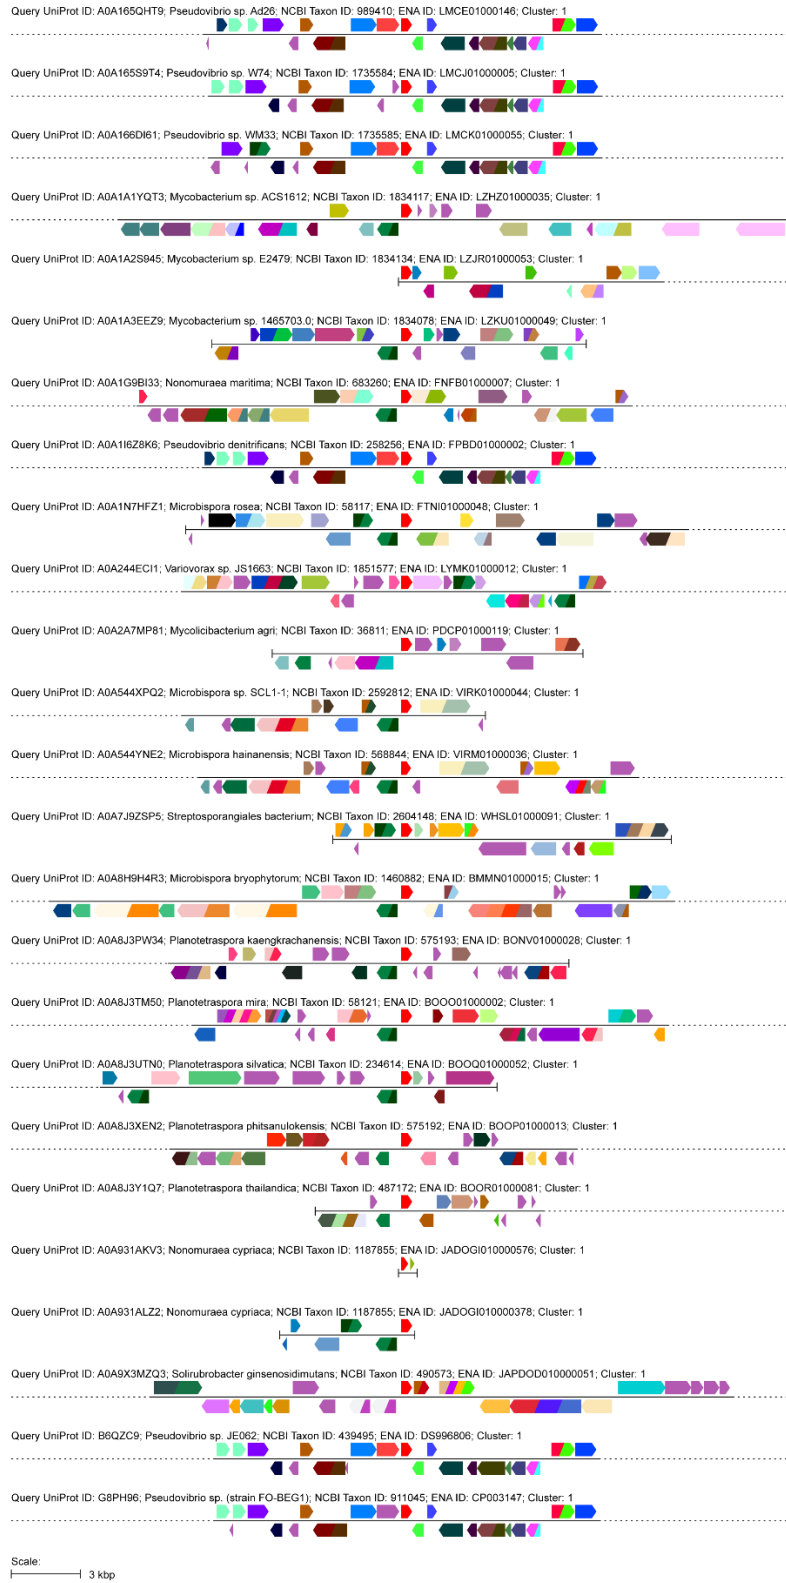

**Figure S5:** Gene neighborhoods of NnIA homologs. NnIA homologs in each neighborhood is color coded red in the middle of the figure.

| <b>Table S1:</b> Elution times for standard by size exclusion chromatography. <sup>a</sup> |        |                 |                                        |
|--------------------------------------------------------------------------------------------|--------|-----------------|----------------------------------------|
| Standards                                                                                  | MW     | Elution volumes | Gel phase distribution coefficient Kav |
| Thyroglobulin                                                                              | 670000 | 10.19           | 0.073                                  |
| γ-globulin                                                                                 | 158000 | 13.82           | 0.317                                  |
| Ovalbumin                                                                                  | 44000  | 16.45           | 0.493                                  |
| Myoglobin                                                                                  | 17000  | 18.54           | 0.634                                  |

<sup>a</sup>Flow rate 0.75 mL/min, 100 mM tricine and 100 mM NaCl buffer pH 7.5.

| <b>Table S2:</b> NnIA homologs analytical size exclusion values. <sup>a</sup> |         |                |                                        |
|-------------------------------------------------------------------------------|---------|----------------|----------------------------------------|
| Protein sample                                                                | MW      | Elution volume | Gel phase distribution coefficient Kav |
| <i>Pd</i> NnIA                                                                | 49,000  | 16.23          | 0.478                                  |
| <i>Ps</i> NnIA                                                                | 38,200  | 16.79          | 0.516                                  |
| <i>Ms</i> NnIA                                                                | 36,400  | 16.90          | 0.523                                  |
| <i>Mr</i> NnIA                                                                | 35,900  | 16.93          | 0.526                                  |
| Oligomer <i>Vs</i> NnIA                                                       | 397,000 | 11.51          | 0.162                                  |
| Dimer <i>Vs</i> NnIA                                                          | 41,400  | 16.61          | 0.504                                  |

<sup>a</sup>Flow rate 0.75 mL/min, 100 mM tricine and 100 mM NaCl buffer pH 7.5.

| <b>Table S3:</b> Nitrogen mass balance resulting from NnIA reaction with NNG |                                                                    |                                                                        |
|------------------------------------------------------------------------------|--------------------------------------------------------------------|------------------------------------------------------------------------|
| NnIA <sup>a</sup>                                                            | Reduced NnIA [NO <sub>2</sub> <sup>-</sup> ] <sub>final</sub> (μM) | As Isolated NnIA [NO <sub>2</sub> <sup>-</sup> ] <sub>final</sub> (μM) |
| <i>Mr</i>                                                                    | 250 ± 10                                                           | 10.6 ± 1.7                                                             |
| <i>Pd</i>                                                                    | 260 ± 10                                                           | 51.3 ± 5.3                                                             |
| <i>Ps</i>                                                                    | 250 ± 10                                                           | 31.0 ± 6.7                                                             |
| <i>Ms</i>                                                                    | 250 ± 20                                                           | 22.2 ± 8.5                                                             |

<sup>a</sup>Reaction conditions: 5 μM NnIA, 10 μM sodium dithionite for reduced NnIA and no reducing agent for as isolated NnIA, 350 μM NNG in 30 mM tricine buffer at pH 7.5 and room temperature in anaerobic glovebox.

| <b>Table S4: Test of 2-NAE degradation Vs NnIA (m/z 105.03).<sup>a</sup></b>                                                                                                                                                                                                                   |                                                          |                             |
|------------------------------------------------------------------------------------------------------------------------------------------------------------------------------------------------------------------------------------------------------------------------------------------------|----------------------------------------------------------|-----------------------------|
| <b>Sample</b>                                                                                                                                                                                                                                                                                  | <b>[NO<sub>2</sub><sup>-</sup>]<sub>final</sub> (μM)</b> | <b>Area of Integration</b>  |
| Control samples                                                                                                                                                                                                                                                                                | -5.5 ± 1.4                                               | 2.4 ± 0.4 x 10 <sup>6</sup> |
| Reaction samples                                                                                                                                                                                                                                                                               | 1.8 ± 11.0                                               | 2.0 ± 0.5 x 10 <sup>6</sup> |
| <sup>a</sup> Samples containing 2 mM 2-NAE, excess titanium citrate, and either no Vs NnIA for the control samples or 20 μM reduced NnIA (Fe <sup>II</sup> -NnIA) for the reaction samples. Samples were incubated overnight at room temperature in deoxygenated 23.3 mM tricine buffer pH 7.5 |                                                          |                             |

| <b>Table S5: Expected NNG degrading bacteria based on this study.</b>      |                        |                                             |                                                                                         |
|----------------------------------------------------------------------------|------------------------|---------------------------------------------|-----------------------------------------------------------------------------------------|
| <b>Species</b>                                                             | <b>Bacterial class</b> | <b>Location isolated</b>                    | <b>Ref.</b>                                                                             |
| <i>Variovorax sp.</i><br>Strain JS 1663                                    | betaproteobacteria     | USA: activated sludge from Ammunition Plant | [1]                                                                                     |
| <i>Pseudovibrio denitrificans</i> JCM 12308                                | alphaproteobacteria    | Taiwan: seawater                            | [2]                                                                                     |
| <i>Pseudovibrio japonicus</i> strain KCTC 12861                            | alphaproteobacteria    | Japan: seawater                             | [3]                                                                                     |
| <i>Pseudonocardia spinospora</i> DSM 44797                                 | actinomycetia          | S. Korea: soil                              | [4]                                                                                     |
| <i>Mycobacterium sp.</i> 1465703.0                                         | actinomycetia          | Mozambique: Host cultures                   | J. Craig Venter Institute Genome Center for Infectious Diseases. Accession: PRJNA305922 |
| <i>Microbispora rosea</i> subsp. <i>nonnitritogenes</i> strain NRRL B-2631 | actinomycetia          | Unknown: acidic volcanic ash                | Ref. [5]                                                                                |

## References

1. Mahan, K. M.; Zheng, H.; Fida, T. T.; Parry, R. J.; Graham, D. E.; Spain, J. C., A novel, iron-dependent enzyme that catalyzes the initial step in the biodegradation of N-nitroglycine by *Variovorax* sp. strain JS1663. *Appl. Environ. Microbiol.* **2017**, *83*, e00457-17.
2. Shieh, W. Y., Lin, Y. T., Jean, W. D. *Pseudovibrio denitrificans* gen. nov., sp. nov., a marine, facultatively anaerobic, fermentative bacterium capable of denitrification. *International journal of systematic and evolutionary microbiology*, **2004**, *54*(6), 2307-2312
3. Hosoya, S., Yokota, A., *Pseudovibrio japonicus* sp. nov., isolated from coastal seawater in Japan. *International journal of systematic and evolutionary microbiology*. **2007**, *57*(9) 1952-1955.
4. Lee, S. D., Kim, E. S., Kang, S. O., Hah, Y. C. *Pseudonocardia spinosispora* sp. nov., isolated from Korean soil. *International journal of systematic and evolutionary microbiology*, **2002**, *52*(5), 1603-1608.
5. Nonomura, H. Distribution of actinomycetes in the soil. IV. Isolation and taxonomy of the genus *Microbispora*. *J. Ferment. Technol.* **1960**, *38*, 401-405.
